# Supplementary material for: Separation, identification and fast determination of organophosphate pesticide methidathion in tea leaves by thin layer chromatography–surface-enhanced Raman scattering
Source: Royal Society of Chemistry journal article supplement (doi:10.1039/c3ay41152d), 2013-01-01
Supplement: c3ay41152d.pdf [file c3ay41152d.pdf]

Supporting information for

## **Separation, identification and fast determination of organophosphate pesticides methidathion in tea leaves by thin layer chromatography-surface enhanced Raman scattering**

**Chaoping Yao,<sup>a,b</sup> Fansheng Cheng,<sup>b</sup> Cong Wang,<sup>b</sup> Yonghong Wang,<sup>c</sup> Xiaowei Guo,<sup>a</sup> Zhengjun Gong,<sup>c</sup> Meikun Fan,<sup>c,\*</sup> Zhiyou Zhang<sup>d\*</sup>**

<sup>a</sup> Department of Optoelectronic Information, University of Electronic Science and Technology of China, Chengdu, Sichuan, 610051, China.

<sup>b</sup> Chengdu Green Energy and Green Manufacturing R&D Centre, Chengdu, Sichuan, 610207, China.

<sup>c</sup> Faculty of Geosciences and Environmental Engineering, Southwest Jiaotong University, Chengdu, 610031, China.

<sup>d</sup> Institute of Nanophotonics Technology, School of Physical Science and Technology, Sichuan University, Chengdu, 610064, China

<sup>e</sup> Center for Animal Disease Control and Prevention of Chongqing, Chongqing, 401147, China

\*Corresponding authors: M. Fan, [meikunfan@gmail.com](mailto:meikunfan@gmail.com); Z. Zhang, [zhangzhiyou@scu.edu.cn](mailto:zhangzhiyou@scu.edu.cn)

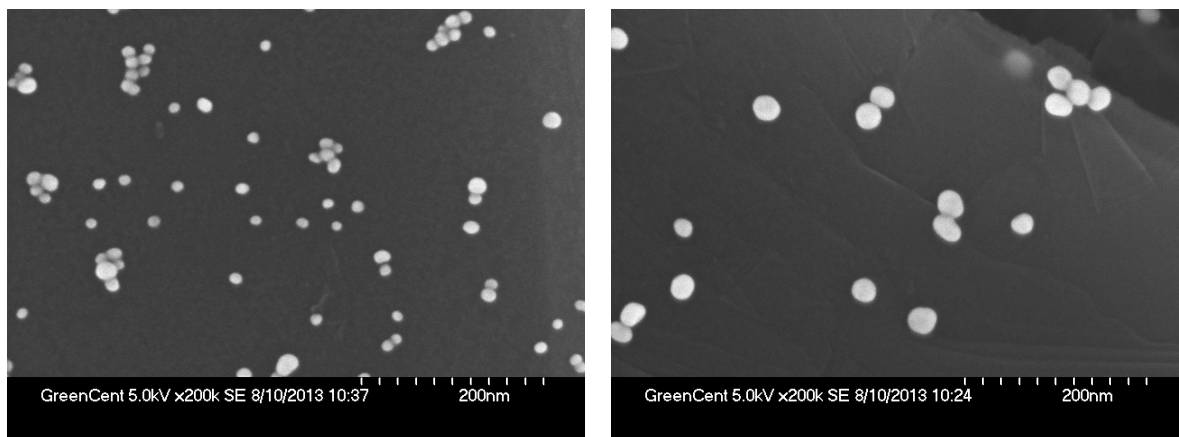

Fig. s1 SEM of gold NPs. Left, 13 nm; right, 40 nm. Scale bar is 200 nm.

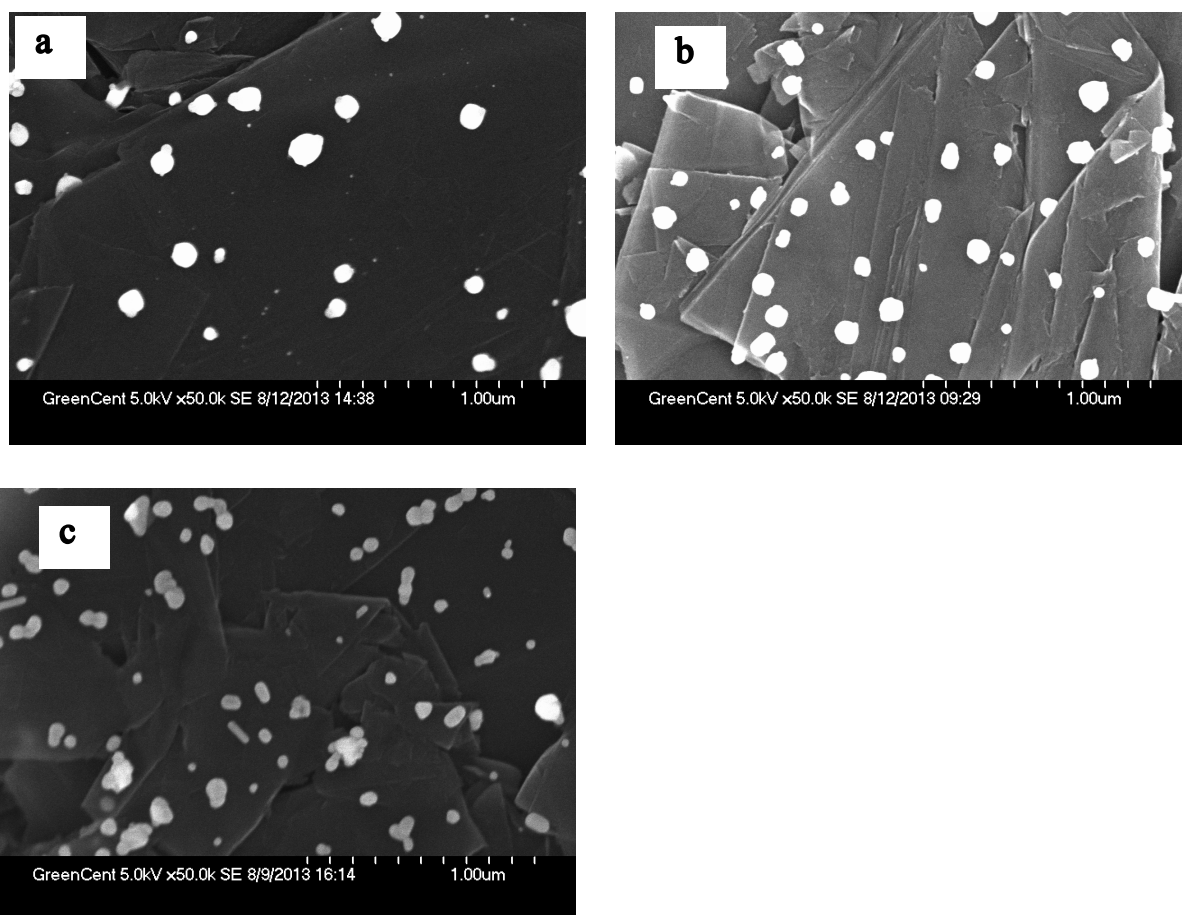

Fig. s2 SEM images of Ag NPs. a, 0.5 mM; b, 1 mM; c, 2 mM. Scale bar is 1 μm.

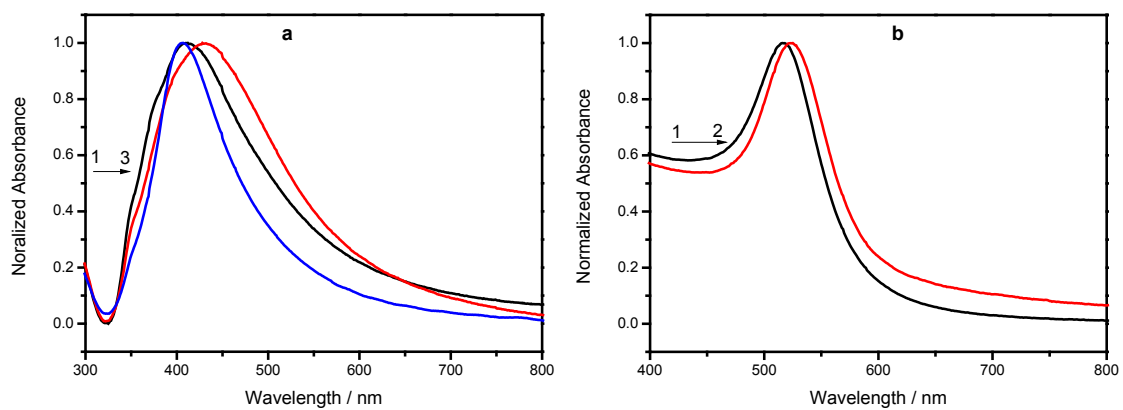

Fig. s3 UV-vis absorption of NPs prepared. a, 1-3 are 0.5, 1, 2 mM, respectively; b, 1, 13 nm Au, 2, 40 nm Au.

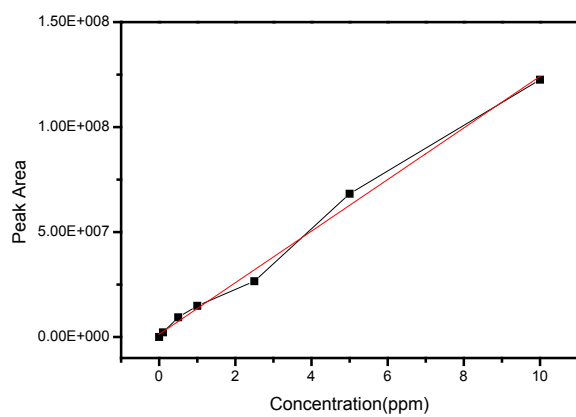

Fig. s4 Calibration curve for detection methidathion in tea samples with GC-MS technique.  $Y=1.22853E7x+1.3103E6$  ,  $R^2=0.99315$ .

Table s1 Test of spiked tea samples by GC-MS

| Tea brand     | Jasmine | Oolong | Green tea |
|---------------|---------|--------|-----------|
| Spiked (ppm)  | 5.00    | 5.00   | 5.00      |
| detected(ppm) | 4.94    | 5.36   | 5.43      |
| Recovery (%)  | 98.7    | 107    | 109       |
